# Supplementary material for: Ginsenoside CK Inhibits Hypoxia-Induced Epithelial–Mesenchymal Transformation through the HIF-1α/NF-κB Feedback Pathway in Hepatocellular Carcinoma
Source: MDPI journal article supplement (doi:10.3390/foods10061195), 2021-05-26
Supplement: s1 [file s1]

Table. S1. Details of the antibodies

| Antibody                       | Source | Catalog Number | Dilution Rate |
|--------------------------------|--------|----------------|---------------|
| E-cadherin                     | Rabbit | 20874-1-AP     | 1:7500        |
| Vimentin                       | Rabbit | 10366-1-AP     | 1:2500        |
| N-cadherin                     | Rabbit | 22018-1-AP     | 1:5000        |
| Snail                          | Rabbit | 26183-1-AP     | 1:1000        |
| HIF-1 $\alpha$                 | Rabbit | 20960-1-AP     | 1:5000        |
| Twist1                         | Rabbit | 25465-1-AP     | 1:1000        |
| I $\kappa$ B- $\alpha$         | Rabbit | 10268-1-AP     | 1:2000        |
| p65                            | Rabbit | 66535-1-Ig     | 1:3000        |
| Lamin B1                       | Rabbit | 12987-1-AP     | 1:5000        |
| ICAM-1                         | Rabbit | 60299-1-Ig     | 1:10000       |
| CA9                            | Rabbit | 11071-1-AP     | 1:2000        |
| c-Myc                          | Rabbit | 10828-1-AP     | 1:2000        |
| HIF-1 $\alpha$                 | Mouse  | 66730-1-Ig     | 1:5000        |
| VEGF                           | Mouse  | 66828-1-Ig     | 1:2000        |
| phospho-I $\kappa$ B- $\alpha$ | Rabbit | 2859           | 1:1000        |
| phospho-p65                    | Rabbit | 3031           | 1:1000        |
| MMP-2                          | Rabbit | CY5189         | 1:1000        |
| MMP-9                          | Rabbit | CY1226         | 1:1000        |

Table.S2 Primer Sequences

|                |   |                                  |
|----------------|---|----------------------------------|
| HIF-1 $\alpha$ | F | 5'-CTCATCAGTTGCCACTTCCACATA-3'   |
|                | R | 5'-AGCAATTCATCTGTGCTTTTCATGTC-3' |
| VEGF           | F | 5'-TCACAGGTACAGGGATGAGGACAC-3'   |
|                | R | 5'-CAAAGCACAGCAATGTCCTGAAG-3'    |
| CA9            | F | 5'-ACCAGACAGTGATGCTGAGTGCTAA-3'  |
|                | R | 5'-TCAGCTGTAGCCGAGAGTCACC-3'     |
| c-Myc          | F | 5'-GGCTCCTGGCAAAGGTCA-3'         |
|                | R | 5'-CTGCGTAGTTGTGCTGATGT-3'       |
| ICAM-1         | F | 5'-AAACACTAGGCCACGCATC-3'        |
|                | R | 5'-CCCACCACTTCCCCTCT-3'          |
| GAPD<br>H      | F | 5'-GGGGAAGGTGAAGGTCGGAG-3'       |
|                | R | 5'-TCTCGCTCCTGGAAGATGGTGAT-3'    |

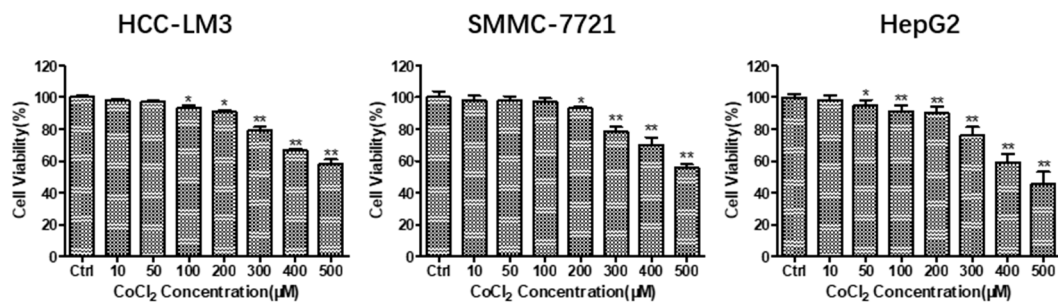

Fig. S1 Cytotoxicity of CoCl<sub>2</sub> treatment on HCC cell lines after 48h were determined by MTT assay. Figures are presented as mean±SD of six replicates.

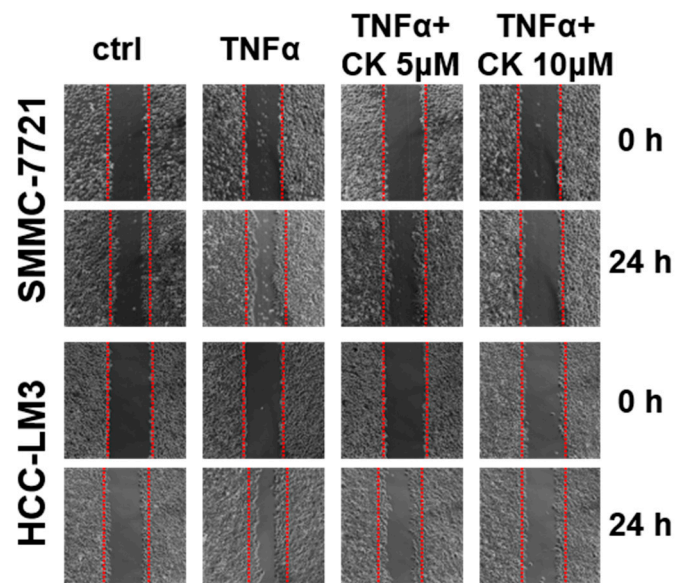

Fig. S2 Effect of ginsenoside CK on metastasis potential of HCC cell lines triggered with TNFα were determined by scratch assay.
